# Supplementary material for: Ten years of progress—improved hysterectomy outcomes in Finland 1996–2006: a longitudinal observation study
Source: HighWire-hosted journal article supplement (doi:10.1136/bmjopen-2013-003169), 2013-10-01
Supplement: bmjopen-2013-003169supp_protocol.pdf [file bmjopen-2013-003169supp_protocol.pdf]

## Study protocol

The questionnaire sheets were used only in Finnish (below).

Data collection was nationwide and followed the same procedure in both annual cohorts of 1996 and 2006. The forms (FINHYST 1996 and 2006) were used to collect data on preoperative, peroperative and postoperative events and operation-related morbidity during the patients' hospital stay and convalescence.

### FINHYST 2006 (Leikkaava lääkäri täyttää) Sivu 1

Rengasta oikea vaihtoehto. Lomake täytetään kaikista muista kohdunpoistoista paitsi syövästä, borderline munasarjakasvaimista ja synnytyksen jälkeisistä kohdunpoistoista

Potilaan nimi ja SOTU (miehellään tarra): \_\_\_\_\_

Sairaala \_\_\_\_\_

Toimenpidepäivä: \_\_\_\_\_ Lomakkeen täyttöpäivä: \_\_\_\_\_

Leikkaaja: **1.** erikoislääkäri / **2.** erikoistuva lääkäri

Leikkaajan kokemus ko. leikkauksessa: **1.** alle 10 kpl / **2.** 10-30 kpl / **3.** yli 30 kpl

Kohdunpoisto:

**1. a.** Abdominaalinen totaali / **b.** abdominaalinen amputaatio

**2. a.** LH (uterinat yläkautta) / **b.** LAVH (uterinat alakautta) / **c.** laparoskooppinen amputaatio

**3.** Vaginaalinen

**4.** Konversio (mistä mihin \_\_\_\_\_, syy \_\_\_\_\_)

**5.** Kohdun paloittelu sen ulos saamiseksi

**TÄRKEIN** preoperatiivinen syy miksi leikattiin (vain **YKSI** vaihtoehto): ICD-10 \_\_\_\_\_

**1.** Myoma(t)

**2.** Menorrhagia

**3.** Dysmenorrhea

**4.** Endometrioosi

**5.** Laskeumat

**6.** Adnextuumori

**7.** Muu, mikä \_\_\_\_\_

Muuttuiko tärkein diagnoosi leikkauksen jälkeen? **1.** ei / **2.** kyllä: uusi dg (ICD-10) \_\_\_\_\_

Potilaan pituus \_\_\_\_\_ cm, paino \_\_\_\_\_ kg

Pariteetti: \_\_\_\_\_ joista alatiesynnytyksiä \_\_\_\_\_ kpl ja sektioita \_\_\_\_\_ kpl

Aikaisemmat muut vatsanalueen leikkaukset: laparoskopioita \_\_\_\_\_ kpl, laparotomioita \_\_\_\_\_ kpl

Antibioottiprofylaksia:

**1.** ei

**2.** kyllä: **a.** kefuroksiimi / **b.** metronidatsoli / **c.** muu, mikä \_\_\_\_\_ + annos \_\_\_\_\_

Lääkkeellinen tromboosiprofylaksia:

**1.** ei

**2.** kyllä: **a.** minihepariini / **b.** muu, mikä \_\_\_\_\_ + annos \_\_\_\_\_ + kesto (vrk) \_\_\_\_\_

Leikkauksen kesto (min) (aika 1. viillosta sulkuun) \_\_\_\_\_

Arvioitu/mitattu vuoto (ml) \_\_\_\_\_

Uteruksen paino ilman adnexeja (g) \_\_\_\_\_

Leikkaajan arvio leikkauksen vaikeudesta:

**1.** erittäin helppo / **2.** helppo / **3.** tavallinen / **4.** vaikea / **5.** erittäin vaikea, miksi \_\_\_\_\_

Hemostaasimenetelmä(t):

1. Ligatuurat
2. Bipolaaripoltto
3. Monopolaaripoltto
4. Ultraääniveitsi
5. Muu (Esim. Ligasure), mikä \_\_\_\_\_

Liitännäistoimenpiteitä: Sivu 2

1. Ei
2. Kyllä
- A. a. toisen adneksin poisto / b. molempien adnexien poisto
- B. Vaginaaliset plastiat: a. KA / b. KP
- C. Inkontinenssin korjaus: a. TVT / b. TOT / c. muu \_\_\_\_\_
- D. Enteroseelen korjaus
- E. Leikkausta hankaloittavien kiinnikkeiden irrottelu
- F. Muu, mikä \_\_\_\_\_

Leikkauksen **aikana** havaittu komplikaatio:

1. Ei
2. Kyllä
- A. Yli 1000ml leikkausvuoto
- B. Verisuonivaurio: a. epigastricasuonet / b. suuret suonet (aorta, v.cava, iliacat) / c. muu suoni, mikä \_\_\_\_\_
- C. Rakkovaurio
- D. Uretervaurio
- E. Suolivaurio
- F. Tekniset laiteongelmat, mikä \_\_\_\_\_
- G. Muu, mikä \_\_\_\_\_

Miten komplikaatio hoidettiin \_\_\_\_\_

Leikkauksen **jälkeen** osastolla todettu komplikaatio:

1. Ei
2. Kyllä
- A. Reoperaatio, syy \_\_\_\_\_
- B. Postoperatiivinen vuoto/hematoma
- C. Haavainfektio (vaatinut antibiootin, punktion tai dreneerauksen)
- D. Virtsatieinfektio (Uricult > 10<sup>5</sup>)
- E. Epäselvä kuumeilu (aksillaarinen lämpö  $\geq 38^{\circ}\text{C}$ )
- F. Syvä laskimotromboosi
- G. Keuhkoembolia
- H. Rakkovaurio
- I. Uretervaurio
- J. Suolenvetovaikeus
- K. Suolivaurio
- L. Hernia, mikä \_\_\_\_\_
- M. Muu ongelma, mikä \_\_\_\_\_

Miten komplikaatio hoidettiin \_\_\_\_\_

Potilas sai verensiirron

1. Ei
  2. Kyllä a. ennen leikkausta \_\_\_\_ punasoluyksikkö/ b. leikkauksen aikana \_\_\_\_ punasoluyksikköä/ c. leikkauksen jälkeen \_\_\_\_ punasoluyksikköä
- Kotiutuspäivämäärä \_\_\_\_\_ Sairasloma (vrk) \_\_\_\_\_ (sisältää sairaalassa oloajan)

**FINHYST 2006 JÄLKIKOMPLIKAATIOLOMAKE (Lääkäri täyttää)**

Täytetään vain mikäli potilas joutuu uudestaan sairaalaan komplikaation takia

Potilaan nimi ja SOTU (mielellään tarra): \_\_\_\_\_

Sairaala: \_\_\_\_\_

Kohdunpoistopäivä: \_\_\_\_\_

Lomakkeen täyttöpäivä: \_\_\_\_\_

Komplikaation toteamispäivä \_\_\_\_\_

Havaittu komplikaatio:

**1.** Reoperaatio, syy \_\_\_\_\_

**2.** Verensiirtoon johtanut anemia

**3.** Haavainfektio (vaatinut antibiootin, punktion tai dreneerauksen)

**4.** Virtsatieinfektio (Uricult > 10<sup>5</sup>)

**5.** Epäselvä kuumeilu (Aksillaarinen lämpö  $\geq 38$  °C)

**6.** Lantionpohjan infektio (hematoma ja/tai abskessi)

**7.** Syvä laskimotromboosi

**8.** Keuhkoembolia

**9.** Rakkovaurio

**10.** Uretervaurio

**11.** Suolenvetovaikeus

**12.** Suolivaurio

**13.** Hernia, mikä \_\_\_\_\_

**14.** Muu ongelma, mikä \_\_\_\_\_

Miten komplikaatio hoidettiin

\_\_\_\_\_  
\_\_\_\_\_  
\_\_\_\_\_

Sairaalassa oloaika (vrk) \_\_\_\_\_

Uusi sairasloma (lisä vrk) \_\_\_\_\_

Potilas **1.** on työssä / **2.** ei ole työssä
